**Sensing and seeing associated with overlapping occipitoparietal activation in  
simultaneous EEG-fMRI**

Catriona L. Scrivener

MRC Cognition and Brain Sciences Unit, University of Cambridge, Cambridge, UK

Centre for Integrative Neuroscience and Neurodynamics, University of Reading, UK

Asad Malik, Michael Lindner, Etienne B. Roesch

Centre for Integrative Neuroscience and Neurodynamics, University of Reading, UK

Author Note

Correspondence regarding this article should be addressed to C. L. Scrivener at the MRC Cognition and Brain Sciences Unit, 15 Chaucer Rd, Cambridge, CB2 7EF (email: [c.l.scrivener@mrc-cbu.cam.ac.uk](mailto:c.l.scrivener@mrc-cbu.cam.ac.uk))

## Abstract

The presence of a change in a visual scene can influence brain activity and behaviour, even in the absence of full conscious report. It may be possible for us to *sense* that such a change has occurred, even if we cannot specify exactly where or what it was. Despite existing evidence from electroencephalogram (EEG) and eye-tracking data, it is still unclear how this partial level of awareness relates to fMRI BOLD activation. Using EEG, functional magnetic resonance imaging (fMRI), and a change blindness paradigm, we found multi-modal evidence to suggest that *sensing* a change is distinguishable from being *blind* to it. Specifically, trials during which participants could detect the presence of a colour change but not identify the location of the change (*sense* trials), were compared to those where participants could both detect and localise the change (*localise* or *see* trials), as well as change blind trials. In EEG, late parietal positivity and N2 amplitudes were larger for *localised* changes only, when compared to change blindness. However, ERP-informed fMRI analysis found no voxels with activation that significantly co-varied with fluctuations in single-trial late positivity amplitudes. In fMRI, a range of visual (BA17,18), parietal (BA7,40), and midbrain (anterior cingulate, BA24) areas showed increased fMRI BOLD activation when a change was *sensed*, compared to change blindness. These visual and parietal areas are commonly implicated as the storage sites of visual working memory, and we therefore argue that sensing may not be explained by a lack of stored representation of the visual display. Both *seeing* and *sensing* a change were associated with an overlapping occipitoparietal network of activation when compared to *blind* trials, suggesting that the quality of the visual representation, rather than the lack of one, may result in partial awareness during the change blindness paradigm.

*Keywords:* EEG-fMRI, change blindness, sensing, conscious awareness

## Sensing and seeing associated with overlapping occipitoparietal activation in simultaneous EEG-fMRI

### Introduction

1

2 It is common for us to overestimate the amount of information that we can process  
3 and store about the world around us. Although we may assume that we would notice a  
4 cyclist entering the path of our car, or if a building on our street changed in colour, we  
5 very often miss these occurrences (Simons, 2000; Simons & Levin, 1997). The failure to  
6 detect changes between visual scenes is known as change blindness, and is used as evidence  
7 to suggest that our internal representation of the outside world is not as complete as once  
8 thought (Rensink, 2004; Noe et al., 2000). When changes to an image are disrupted in  
9 some way, for example by a distractor image or a visual saccade, we cannot use visual  
10 transients (or motion) to detect them, and are often blind to the difference (Rensink  
11 et al., 1997; Kanai & Verstraten, 2004).

12 It was previously assumed that if we are blind to a change then we cannot provide  
13 any information about it, and that the change should not influence our behaviour in any  
14 way. Blindness to changes is thought to result from a lack of detailed representation  
15 about the pre- and post-change scenes, or an inability to successfully compare the two  
16 (Simons, 2000). If this is the case, then our knowledge when we are blind to changes  
17 should be equivalent to that when there is no change at all. Anecdotally, this does not  
18 align with the experience of observers in a change blindness experiment; it is common for  
19 them to remark that they suspected something had changed, but that they were not sure  
20 about its nature or location. This experience appears to be phenomenologically different  
21 from complete change blindness, but how this difference is reflected in behavioural and  
22 neuroimaging data is unclear.

23 In the domain of visual consciousness, there is a recurring debate on the nature  
24 of visual awareness; whether it is graded, or dichotomous, or a combination determined  
25 by the context. In the Global Neuronal Workspace Theory (Dehaene & Naccache, 2001;  
26 Dehaene et al., 2006), it is posited that awareness arises when inputs cross a threshold for  
27 ‘ignition’, resulting in the distribution and maintenance of information within a ‘global

28 workspace'. Based on this proposal, conscious awareness is a dichotomous state, as only  
29 inputs selected by attention can spark the activation of the global workspace. This  
30 consists of a large network of connected regions, including prefrontal and parietal regions  
31 as well as the thalamic nuclei and basal ganglia (Dehaene & Changeux, 2011). Therefore,  
32 conscious awareness requires directed attention and activation of a distributed frontal-  
33 parietal network, in an 'all-or-nothing' fashion.

34 In accordance with this, fMRI studies specifically investigating change blindness  
35 report that detected changes are associated with greater activation in the parietal lobe,  
36 dorsolateral prefrontal cortex, and fusiform gyrus, when compared to changes that are  
37 missed (Beck et al., 2001). Further, detected changes compared with correctly categorised  
38 no-change trials revealed activation in a wider network including the inferior, superior,  
39 and medial temporal gyrus, anterior interparietal sulcus, precuneus, central sulcus, infe-  
40 rior frontal gyrus, anterior cingulate cortex, putamen, pulvinar, and cerebellum (Pessoa,  
41 2004). A similar pattern was identified for false alarm trials, where participants reported  
42 a change when no change occurred, suggesting that activity was related to the partici-  
43 pants' perception of the change rather than properties of the visual stimulus. Overall,  
44 few regions were specifically activated when participants exhibited change blindness.

45 However, this 'all-or-nothing' explanation of visual awareness does not align with  
46 our subjective experience of the world. Based on participants' report of a sense for  
47 something changing, we might conclude that awareness is graded. This allows for a level,  
48 or levels, of awareness lying somewhere on a continuum between full and absent awareness.  
49 In an early experiment, Rensink (2004) suggested the presence of a *sense* condition, in  
50 which observers could detect a change without fully identifying it. Observers were asked  
51 to indicate when they 'thought' that something had changed, and then again when they  
52 were certain of it. He argued that this *sense* condition is both phenomenologically and  
53 perceptually distinct from the traditionally reported *see* condition in which participants  
54 are fully aware of what change occurred.

55 This definition has been extended and explored using electroencephalogram (EEG)  
56 and eye-tracking, with a range of results suggesting a richer visual experience than either

57 “yes I saw a change” or “no I didn’t see anything” (Busch et al., 2009; Fernandez-Duque  
58 & Thornton, 2003; Kimura et al., 2008; Lyyra et al., 2012; Thornton & Fernandez-Duque,  
59 2001; Howe & Webb, 2014; Chetverikov et al., 2018; Reynolds & Withers, 2015; Lyyra  
60 et al., 2012; Galpin et al., 2008). The distinction could be described by the ‘partial aware-  
61 ness hypothesis’ (Kouider et al., 2010; Kouider & Dehaene, 2007). While the mechanism  
62 of awareness can still be considered dichotomous and dependent on an ignition threshold,  
63 the level of detail contained within the workspace is variable. Stimuli can be represented  
64 with varying detail, based on factors such as stimulus strength, therefore giving rise to  
65 graded knowledge of its contents.

66 In a previous EEG experiment (Scrivener et al., 2019) we distinguished between  
67 trials in which participants could detect the presence of a colour change but not identify  
68 the location of the change (*sense* trials), versus those where participants could both  
69 detect and localise the change (*localise* trials). We chose to measure several ERPs that  
70 are commonly linked to visual attention and awareness, including the visual P1 and N1,  
71 visual awareness negativity (VAN), N2pc, and late positivity (LP) (Koivisto & Revonsuo,  
72 2010; Förster et al., 2020). Although suggested as one of the earliest reflection of conscious  
73 visual awareness (around 200 ms after stimulus onset), we found no statistically significant  
74 differences in the VAN ERP across conditions, contrary to previous findings (Förster et al.,  
75 2020; Koivisto et al., 2008; Wilenius & Revonsuo, 2007; Busch et al., 2009).

76 In a similar time window, the N2pc is characterised by an increased negativity at  
77 visual electrodes contralateral to the change location, and is increased for aware versus  
78 unaware trials (Schankin & Wascher, 2007; Luck & Hillyard, 1994). In our previous  
79 results, both awareness conditions (*localise* and *sense*) were significantly different to trials  
80 with no change detection (*blind* trials), suggesting that the N2pc is not dependent on  
81 explicit awareness. It is possible that *sense* trials elicited a shift in attention to the correct  
82 hemifield of change (and therefore an N2pc was detected), but that this was not specific  
83 enough to determine the exact location of the change.

84 Within the late positivity range (400 - 600 ms after change onset), all conditions  
85 were significantly different from one another. The LP overlaps with the P3 component

86 at central parietal electrode sites, and is often associated with conscious aspects of task  
87 processing (Koivisto et al., 2009; Busch et al., 2009; Railo et al., 2011). Overall, it appears  
88 that simply ‘detecting’ a change can be distinguished from ‘describing’ a change, in both  
89 subjective and neuroimaging results, and that participants can *sense* a change without  
90 complete knowledge of what occurred.

91 The main aim of this experiment was to examine the existence and nature of  
92 the *sense* condition in the change blindness paradigm, using combined EEG-fMRI and  
93 behavioural measures. While a range of evidence posits a distinction between *sense* and  
94 *blind* conditions in EEG data, no such distinction has been made for the *sense* condition in  
95 change blindness using fMRI. One criticism of the sensing hypothesis is that participants  
96 who *sense* a change are simply applying a more liberal response criterion when completing  
97 the task, and in fact are not aware of the change at all (Simons et al., 2005). Similarly,  
98 implicit awareness of changes could also be explained by explicit mechanisms such as  
99 guessing or a process of elimination (Mitroff et al., 2002). If this is the case, then we  
100 would expect to find no significant differences between *sense* and *blind* trials in fMRI  
101 BOLD activation. This result could also support the hypothesis of visual consciousness  
102 as dichotomous. However, if sensing lies somewhere on a continuum between aware and  
103 unaware, perhaps explained by varying precision of the stimuli representation within the  
104 global workspace, then BOLD activation for *sense* trials may be separable to both fully  
105 aware and change *blind* trials.

106 Further, we aimed to improve the respective temporal and spatial resolution of  
107 EEG and fMRI by measuring them simultaneously. In an extension to our previous EEG  
108 results (Scrivener et al., 2019), we investigated how EEG correlates of visual awareness  
109 relate to changes in fMRI BOLD. We therefore aimed to identify brain regions with  
110 BOLD activity that co-varied with activity in the EEG data, to detect possible sources  
111 or networks associated with awareness of changes.

## Materials and Methods

112

113 All materials and analysis methods were pre-registered in an open document on  
114 the Open Science Framework, where the data and analysis for this project can also  
115 be found (<https://doi.org/10.17605/OSF.IO/W6BH3>). Structural images were defaced  
116 using Brainstorm3 (Tadel et al., 2011) in MATLAB (MathWorks, Inc., version 2014a)  
117 with SPM8.

### 118 Participants

119 Twenty one right-handed subjects (mean  $\pm$  SD, age = 21  $\pm$  3.6, 6 male) with  
120 no history of psychiatric or neurological disorders participated in this EEG-fMRI study.  
121 All had corrected-to-normal vision and were not colour blind (based on self report).  
122 The experiment was approved by the University of Reading ethics committee (UREC:  
123 16/120), and was conducted in accordance with the Declaration of Helsinki (as of 2008).  
124 All participants gave informed consent to take part, including consent to share their  
125 anonymised data. For EEG and behavioural analysis, one participant was removed due  
126 to failure to remove MRI related artifacts from the EEG, leaving N=20. Four additional  
127 participants were removed from the fMRI and EEG-fMRI analysis for having motion  
128 greater than one voxel size in the fMRI data, leaving N=16.

### 129 Stimuli and procedure

130 A change blindness task was presented using Psychtoolbox (Kleiner et al., 2007), on  
131 a 1920 x 1080 LCD monitor with a 60 Hz refresh rate. The paradigm was displayed on a  
132 screen displayed approximately 47cm away from the centre of the scanner bore. This was  
133 viewed by the participant through a mirror mounted onto the coil, at approximately 12cm  
134 from the participant's eyes. In their left hand, the participant held an alarm ball, and in  
135 their right they held a 4 key button box. They had to use all of the 4 keys to respond  
136 to the task. Participants were asked to fixate on a central fixation cross and identify  
137 changes between consecutive displays of coloured squares. These were interrupted by  
138 a short fixation display to facilitate the change blindness phenomenon (see figure 1 for

139 details on display duration). On change trials, one of the squares changed colour from  
140 the first to the second display. On no-change trials, the displays were identical. This was  
141 followed by two or three questions, depending on the participant's response to the first  
142 question.

143 Question 1 asked 'Did you see a change?' to which participants could respond 'yes'  
144 or 'no'. Question 2 asked participants to localise the change, based on a 2x2 grid from top  
145 left to bottom right. Question 3 asked how certain participants were of their responses,  
146 ranging from '1: Very Uncertain' to '4: Very Certain'. If participants responded 'no'  
147 change to question 1, they were asked to press any button to ensure the same number  
148 of button presses were made during each trial. We did not ask participants who did not  
149 see the change to guess a location, as our hypotheses did not relate to 'implicit' change  
150 detection, as reported in Fernandez-Duque & Thornton (2000). Participants were asked  
151 to respond within a limit of two seconds for each question, and trials with any response  
152 missing were not included in further analysis.

153 This study had a within-subjects repeated measures design, and each participant  
154 completed 5 blocks of 50 trials, meaning a total of 250 trials. Of these 250 trials, 165  
155 contained a change in coloured square, and the remaining trials contain no change. The  
156 ratio was not kept at 50/50, as the trials containing the change were of most interest for  
157 analysis. However, after the experiment participants were asked to report the percentage  
158 of trials that they believed contained a change. After each block of 50 trials, the partici-  
159 pants were presented with a break screen, advising them to take a break. The participant  
160 was able to continue the experiment at their discretion by pressing any button on the  
161 button box. Before beginning the main task, participants were given a short block of 10  
162 trials in which to practice responding to the paradigm with the button box. The data  
163 from this practice block was not analysed.

164 Difficulty was modulated in real time by adding and removing two squares from the  
165 display, based on the assumption that more distractors increases task difficulty (Vogel  
166 et al., 2005). This was to prevent floor and ceiling performance during the task as a result  
167 of individual differences (Luck & Vogel, 2013), and optimise for performance rather than



168 to establish specific individual thresholds. Performance over the previous two trials was  
169 used to update the current trial; two consecutive correct answers added two squares, two  
170 incorrect deducted two squares, and one correct and one incorrect resulted in no change.  
171 The decision to increase or decrease the number of squares was made using responses  
172 to the localisation question (Q 2), as we were specifically interested in controlling the  
173 number of *sense* and *localise* trials. The number of squares always changed by two, to  
174 balance the number on the left right hemifields of the screen. The location of the change  
175 on each trial was random, but the change occurred an equal number of times on the left  
176 and right hemifield of the screen. The display was divided into 36 even sections, with 6  
177 in each quadrant, within which the squares could appear. As the colour of the squares  
178 was not related to our main hypotheses, we used seven default MATLAB colours; blue,  
179 cyan, yellow, green, white, red, and magenta (MathWorks, Inc., version 2016b).

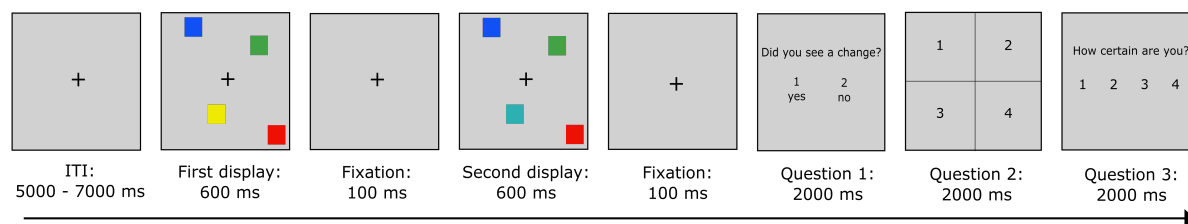

*Figure 1.* Illustration of the experimental paradigm. The number of squares presented varied from 2 to a maximum of 36. Question 1 asked ‘Did you see a change?’ to which participants could respond ‘Yes’ or ‘No’. Question 2 asked participants to localise the change, based on a grid from top left to bottom right. Question 3 asked how certain participants were of their responses, ranging from ‘1: Very Uncertain’ to ‘4: Very Certain’. If participants responded ‘no change’ to question 1, they were asked to press any button instead of the localisation response.

## 180 Behavioural Analysis

181 The trials in which a change occurred were divided into three conditions: *blind*  
182 (no change detection), *localise* (change detection and localisation), and *sense* (change  
183 detection without localisation). Trials in which no change occurred were divided into  
184 *correct rejection* (no change reported) and *false alarm* (change incorrectly reported).

185 The number of false alarm trials was low, with a mean of 10 trials (range = 1 – 28,  
186  $SD = 7.34$ ), and therefore EEG analysis comparing *false alarm* to *sense* trials was not  
187 performed due to a lack of power. The percentage of *false alarm* trials was calculated  
188 in relation to the the total number of no-change trials, whereas the percentage of *sense*  
189 trials was calculated in relation to the total number of change trials.

190 Detection accuracy for each participant was calculated based on the percentage  
191 of change trials in which they correctly detected a change. Localisation accuracy was  
192 calculated as the percentage of correctly detected changes where the localisation was  
193 also correct. We also recorded each participant’s mean and maximum difficulty scores,  
194 with the maximum referring to the highest number of squares that were displayed to  
195 them during the experiment. Behavioural analysis was completed in JASP 2018 (version  
196 0.8.2.0).

197 D’prime was calculated as a measure of participant response bias. This was calcu-  
198 lated using the equation  $d = z(\text{hit rate}) - z(\text{false alarm rate})$  (Stanislaw & Todorov, 1999).  
199 Response bias, or criterion, was also calculated, where  $c = -0.5 * (z(\text{hit rate}) + z(\text{false}$   
200  $\text{alarm rate}))$  (Stanislaw & Todorov, 1999) .  $c = 0$  indicates no response bias to either  
201 ‘yes’ or ‘no’ responses.  $c > 0$  indicates a bias towards ‘no’ responses, with fewer hits and  
202 fewer false alarms.  $c < 0$  indicates bias towards ‘yes’, with more hits but also more false  
203 alarms. We expected that participants would display a range of response strategies.

204 One problem faced in identifying a *sense* condition is that it is difficult to distinguish  
205 these trials from those where participants did not really see a change (similar to a false  
206 alarm during no change trials), or those where participants press the wrong response  
207 key (Simons & Ambinder, 2005; Mitroff et al., 2002). Rensink et al. (2004) found that  
208 reaction times when participants thought that they had seen a change were shorter for  
209 change trials than no-change trials, meaning that participants were slower when they were  
210 simply making a false alarm. Galpin et al. (2008) also found greater certainty associated  
211 with *sensing* during change trials, compared to *false alarms*. We therefore compared  
212 reaction times across awareness conditions, as well as between levels of confidence. As  
213 trial numbers were low, ‘very uncertain’ and ‘uncertain’ responses were combined, and

214 ‘certain’ and ‘very certain’ were combined. Each awareness condition therefore had two  
215 levels of certainty; for example, *localise certain* and *localise uncertain*.

216 To establish if the location of the change influenced the likelihood that it was de-  
217 tected, we conducted two chi-square analyses. The first analysis divided the 6 x 6 grid  
218 of possible change locations into two conditions, outside and central. Changes occurring  
219 in any of the 20 outermost locations were considered to be outside changes, and the 16  
220 central locations were considered to be central. We ran a 2 x 3 chi-square with the inde-  
221 pendent variables of location (outside/central) and awareness (*blind/localise/sense*), and  
222 the dependent variable as the frequency of trials within each condition, across partici-  
223 pants. In the second analysis, we instead compared the side of the display in which the  
224 change occurred, resulting in a 2 x 3 chi-square for hemisphere (left/right) and awareness  
225 (*blind/localise/sense*).

## 226 **EEG data acquisition**

227 EEG data was recorded with an MRI-compatible cap equipped with carbon-wired  
228 Ag/AgCL electrodes (Braincap MR) from 64 scalp positions according to the interna-  
229 tional 10-10 system. The reference electrode was placed at FCz and the ground at AFz.  
230 An additional ECG electrode was positioned on the back to measure heart rate. An MRI-  
231 compatible EEG amplifier was used (Brain-Amp MR, Brain Products) with a sampling  
232 rate of 5000Hz. This was positioned at the back of the scanner bore and connected using  
233 ribbon cables that were secured with sandbags. Impedance was kept below 10k $\Omega$  for  
234 EEG channels and 5k $\Omega$  for the ECG. EEG recordings were performed with Brain Vision  
235 Recorder Software (Brain Products) and timings kept constant using a Brain Products  
236 SyncBox to synchronise EEG with the MRI system clock.

## 237 **EEG pre-processing**

238 Raw EEG data was pre-processed using Brain Vision Analyzer version 2.1 (Brain  
239 Products). Correction for the MR gradient artifact was performed using a baseline cor-  
240 rected sliding average of MR volumes (Allen et al., 2000). Removal of cardioballistic  
241 artifacts involved the subtraction of heartbeat artifacts on a second by second basis, us-

242 ing a sliding average of 21 (Allen et al., 1998). The delay was detected using the CBC  
243 detection solution, individually for each subject. Peaks were detected semi-automatically,  
244 with a manual check of the algorithm's estimations. ICA (Infomax; Bell & Senjnowski,  
245 1996) was then used to remove further BCG residual artifacts (range: 1 - 4 additional  
246 ICs removed per participant). As outlined in Debener (2005), the presence of visual P1  
247 and N1 peaks in the averaged data after pre-processing was used as an indication of the  
248 successful removal of artifacts.

249 The data was downsampled to 500 Hz to reduce computation time and then filtered  
250 with a high-pass filter of 0.1 Hz to remove low frequency drift (Butterworth, 2nd order).  
251 A low-pass filter of 40 Hz and a notch filter of 50 Hz were chosen to remove line noise.  
252 Independent component analysis (ICA) was used to remove eye movement artifacts (In-  
253 fomax; Bell & Senjnowski, 1996). Two components were removed for each participant;  
254 one corresponding to eye-blinks and the other to lateralised eye-movements.

255 Further analysis was completed using EEGLab (Delorme & Makeig, 2004). Trials  
256 were marked as outliers if any ERP value was greater than 3 standard deviations from  
257 the mean value of that ERP across all trials (using the MATLAB function 'isoutlier').  
258 Note that we only searched for outliers in the electrodes used for analysis (P07, P08, Cz,  
259 Pz, and CPz). Trials marked as containing outliers were excluded from further analysis  
260 ( $M = 7$  trials,  $SD = 12.98$ ), as well as those where a response to any question was not  
261 made within the response time ( $M = 2$  trials,  $SD = 2.79$ ).

262 Segments were then taken from -200 to 7000 ms to include the whole trial, and  
263 baseline corrected using a mean of the data within -200ms to 0ms, where 0ms was the  
264 start of the first display of coloured squares (see figure 1). We chose the baseline period  
265 to be before the first display onset, rather than the second, as we were interested in  
266 visual ERPs that occurred in response to the both displays. It has also been suggested  
267 that ERPs in response to the first presentation of stimuli are related to the subsequent  
268 perception of change (Pourtois et al., 2006).

## 269 EEG Analysis

270 To identify the peaks of the visually evoked potentials (P1 and N1), a grand av-  
271 erage ERP was calculated across all conditions and participants, as advised in Luck and  
272 Gaspelin (2017), from electrodes P07 and P08. From here, the peaks of interest were de-  
273 termined by identifying the local maxima/minima of the expected peaks, using the peak  
274 detection function in BrainVision Analyzer. The mean value within a window around the  
275 peak was used instead of the peak value, as the mean is more robust against noise (Luck,  
276 2014). A window of 40ms around the mean was chosen as the appropriate window for  
277 visual ERPs P1 and N1. In relation to the first display onset, the first P1 was identified  
278 at 124ms, and the first N1 at 142ms. In relation to the second display onset, the second  
279 P1 was identified at 108ms, and the second N1 at 168ms.

280 Based on previous literature (Busch et al., 2010; Tseng et al., 2012; Fernandez-  
281 Duque et al., 2003), the N2pc was defined as the mean within 200-400 ms after the  
282 second display at occipital electrodes PO7 and PO8. Over central parietal electrodes  
283 Cz, CPz and Pz, the VAN was defined within a window of 130-330 ms after the second  
284 display, and the LP within a window of 400-600ms. We used window sizes of 200 ms,  
285 defined a-priori, in an attempt to be conservative given the large variation within the  
286 literature.

287 To assess how differences between early visual components across detection condi-  
288 tions were reflected at each stimulus presentation, P1 and N1 amplitudes were compared  
289 in two separate 2x3 repeated measures ANOVAs, with display (first/second) and aware-  
290 ness (*blind/localise/sense*) as the independent variables. Differences across hemispheres in  
291 the N2pc were analysed with another 2x3 repeated measures ANOVA, with the indepen-  
292 dent variables of hemisphere (contralateral/ipsilateral) and awareness (*blind/localise/sense*).  
293 Amplitudes of the VAN and the LP were compared in two separate repeated measures  
294 ANOVAs with awareness (*blind/localise/sense*) as the independent variable. Where  
295 Mauchly's Test of Sphericity indicated that the assumption had been violated, Greenhouse-  
296 Geisser correction was used. All post-hoc comparisons were two-tailed, and corrected for  
297 multiple comparisons using false discovery rate where  $q = .05$  (Benjamini & Hochberg,

1995). Effect sizes are reported as partial eta squared for ANOVA, and repeated measures Hedge's  $g$  for t-tests (Lakens, 2013).

### Single-trial EEG Analysis

As listed a-priori in our pre-registration document on the OSF, we used two methods to extract the single-trial ERP values. The first method used the raw EEG time series, while the second used EEG values extracted from the ICA component with maximum correlation with our ERP of interest. Our reason for using both methods was to increase our sensitivity for extracting meaningful single trial values, given the reduced signal to noise ratio in EEG data recorded inside the MR environment.

Raw values: for each ERP time window, single-trial values were calculated as the mean amplitude within the predefined window for that peak. These values were then baseline corrected by subtracting the mean amplitude across the trial from which they were taken. Outliers were identified as trials where the amplitude was more than 3 standard deviations away from the mean amplitude for that ERP. As large artifacts can raise the mean amplitude, we added the additional classification of outliers at values  $\pm 30 \mu V$ . These outlier values were replaced by the mean value across all other trials, as outlined in Bénar et al. (2007).

ICA derived values: this method was similar to that mentioned above, with the exception that the single-trial values were taken from a single ICA component, identified separately for each participant. First, ICA was computed on the pre-processed data for a single subject (FastICA in EEGLab; Hyvärinen & Oja, 1997). For each independent component (IC) extracted, a mean IC ERP was calculated by averaging the time course across all trials. The average IC ERP time courses were then correlated with the average ERP time course from the electrodes of interest in the pre-processed EEG data; for the LP this was the average ERP from the central electrodes (Cz, Pz, CPz). The IC component with the highest correlation with the ERP of interest was inspected to ensure that the topology was as expected; for the LP this was positivity over the central electrodes. Once selected, the single-trial values were extracted from the time series of this component, as

326 described above. For some participants, the IC with the highest correlation was an artifact  
327 component, identified by visually inspecting the component's time series, topography, and  
328 frequency spectrum in EEGLab. We also utilised the EEGLab function 'ICLabel' to aid  
329 classification of artifact components. When this was the case (3 participants), the IC  
330 with the next highest correlation was selected for that participant.

### 331 **fMRI recording**

332 MRI data was acquired using a 3.0-T whole-body MRI scanner (Prisma, Siemens)  
333 and a 64 channel coil for functional imaging. Interleaved slices were recorded using a 2D  
334 echo planar imaging (EPI) sequence [repetition time (TR) 1630ms; echo time (TE) 30ms;  
335 flip angle 90°; voxel size 3mm x 3mm; gap 3mm; encoding direction A to P; distance factor  
336 20%; FOV read 192mm; number of slices 30; transversal orientation]. Three dummy  
337 scans were acquired at the beginning of each block. As well as the functional scans, an  
338 anatomical scan of the entire brain was acquired [3D MPRAGE; sagittal; TE 2.37ms;  
339 TR 1800ms; flip angle 8°; voxel size 0.98mm x 0.98mm; FOV read 250mm; slice thickness  
340 0.85mm; slices per slab 208; ascending acquisition; phase encoding direction A to P].

### 341 **fMRI Pre-processing**

342 MRI images were pre-processed using the procedure recommended in SPM12 (Well-  
343 come Department of Imaging Neuroscience, Institute of Neurology, London, UK). Func-  
344 tional images were first re-aligned per experimental block. These were registered to the  
345 mean image with a 6th degree spline interpolation. Following this was co-registration of  
346 the structural image to aligned functional images, segmentation of white and gray matter,  
347 normalisation of functional images using the deformation field created during segmenta-  
348 tion, and normalisation of the functional to structural. The resulting data was smoothed  
349 with a 4-mm full-width-half-maximum Gaussian Kernel, and a high-pass filter with a cut  
350 off period of 128 s was applied. The registration of images was checked visually at each  
351 stage. Parameters not specified here can be assumed as the default SPM parameters.

## 352 **fMRI Analysis**

353 During first level analysis, general linear models (GLM) with event-related designs  
354 were conducted in SPM12, to identify voxels activated in response to trial type (*blind/*  
355 *localise/ sense/ false alarm/ correct rejection*). Regressors were created for each trial type  
356 by convolving the stimulus onset times with the canonical hemodynamic response function  
357 (HRF) across all blocks (Friston et al., 1994). Each regressor had a duration matched  
358 to the length of visual display, and serial correlations were corrected using the AR(1)  
359 method. All fMRI analysis was conducted in relation to the onset of the second display,  
360 where the change could occur. However, given the fast presentation of the two displays,  
361 it is possible that activation from the first display contributed to the activation recorded  
362 during the second. Each block was modelled with a separate set of regressors including  
363 time derivatives, as we did not perform slice time correction. Six motion regressors were  
364 added as nuisance variables.

365 For each participant we ran the following contrasts during first-level analysis; *sense*  
366 *> blind*, *localise > blind*, *localise > sense*, *blind > no-change*, *sense > false alarm*, *false*  
367 *alarm > sense*. We then compared awareness conditions at the second-level using one-  
368 sample t-tests. An additional paired-samples t-test was used to identify voxels with  
369 activation that was significantly different between the pair of contrasts *localise > blind*  
370 and *sense > blind*.

371 The contrasts *localise > blind* and *sense > blind* should reveal voxels with activation  
372 specific to full or partial awareness of the change, respectively, compared to no awareness.  
373 As these three conditions all contain a change in coloured square, the difference is the  
374 participant's level of awareness. In the contrast *localise > sense*, we should identify voxels  
375 only activated when participants can both detect and localise the change, compared to  
376 only change detection. These areas would therefore be indicated in the facilitation of  
377 complete visual awareness, compared to *sensing* alone. We did not run the contrasts in  
378 the other direction, for example *blind > localise*, given previous results that suggest very  
379 little activation present for *blind* trials (Beck et al., 2001; Pessoa, 2004). Contrasting  
380 *blind* and no-change trials should reveal activation specific to the presence of the change,



381 despite the participant being unable to detect it. The contrasts between *sense* and  
382 *false alarm* trials are useful to determine if *sensing* is similar to false alarms, meaning  
383 that participants did not detect anything changing during the change trials and were  
384 overconfident in their awareness.

385 To identify voxels with activation that correlated with the change in task difficulty  
386 over time, a separate GLM model was constructed with one regressor for the onsets of all  
387 trials, and a parametric regressor using the difficulty (or number of squares presented) at  
388 each trial. To identify voxels with activation that correlated with the change in participant  
389 certainty over time, a separate GLM model was constructed with one regressor for the  
390 onsets of all trials, and a parametric regressor using the certainty value reported by the  
391 participant at each trial.

392 Across all fMRI analyses, we report clusters with a minimum size of 20 voxels and  
393 a cluster-level family-wise error (FWE) corrected  $p < .001$ . Extended local maxima were  
394 labelled using two methods that provided overlapping results; the automated anatomical  
395 labeling (AAL) toolbox in SPM (12), with a local maximum radius of 5mm, and the SPM  
396 Anatomy toolbox, which for compatibility reasons used an older version of MATLAB  
397 (2014a) and SPM (SPM8). MNI co-ordinates were used to label voxels according to  
398 Brodmann areas. The SPM render function was used to plot our results on the cortex  
399 of an MNI brain. MRICron was used to create multi-slice views of the t-score maps for  
400 each contrast of interest.

#### 401 **ERP-informed fMRI Analysis**

402 For ERP-informed fMRI analysis, a first-level model with one regressor was con-  
403 structed for the onset of all change trials (*blind/localise/sense*), with single-trial ERP  
404 values included as a parametric regressor. The LP ERP in response to the change display  
405 was chosen a-priori for this analysis, as significant differences have previously been iden-  
406 tified between awareness conditions within this late parietal potential (Scrivener et al.,  
407 2019; Fernandez-Duque & Thornton, 2003; Busch et al., 2010). A second regressor was  
408 added for the onset of all no change trials. Motion parameters were also included as

409 nuisance variables.

## 410 Behavioural Results

### 411 Accuracy and reaction times

412 Accuracy for question 1, in which participants had to identify a change, had a mean  
413 of 54% (range = 39 – 69%,  $SD = 9\%$ ). Accuracy for question 2, in which participants  
414 had to localise the change, had a mean of 72% (range = 61 – 86%,  $SD = 8\%$ ). The mean  
415 difficulty level given to each participant ranged from 6 to 23 squares ( $M = 16, SD = 4$ ),  
416 with the maximum difficulty experienced by each participant ranging from 18 to 36  
417 ( $M = 27, SD = 5$ ). D'prime scores ranged from .940 to 2.30 ( $M = 1.38, SD = .38$ ).  
418 One person had a negative criterion, meaning that they had a response bias towards false  
419 alarms. All other participants had positive criterion, indicating a conservative response  
420 strategy ( $M = .61, SD = .33$ ). D'prime scores were significantly different from 0 in a  
421 one-sampled t-test, indicating that participants could discriminate between change and  
422 no change trials,  $t(19) = 16.263, p < .001$ .

423 Mean difficulty correlated with mean location accuracy ( $r = .543, p = .013$ ) and  
424 d'prime ( $r = -.601, p = .005$ ), but not with mean detection accuracy ( $r = -.371, p =$   
425  $.107$ ). Maximum difficulty also correlated with mean location accuracy ( $r = .537, p =$   
426  $.015$ ) and d'prime ( $r = -.482, p = .031$ ), but not with mean detection accuracy ( $r =$   
427  $-.349, p = .131$ ).

428 The percentage of *false alarm* trials ( $12.23\% \pm 8.64$ ) was lower than the percentage  
429 of *sense* trials ( $28.07\% \pm 7.73$ )  $t(19) = -6.815, p < .001, g_{rm} = 1.85$ , suggesting that  
430 *sense* trials occurred more often than participants made false alarms. Additionally, the  
431 percentage of false alarms was not significantly correlated with the percentage of *sense*  
432 trials ( $r = .198, p = .403$ ).

433 Out of the 20 participants included in the analysis, 15 were slower to respond  
434 when they were *blind* to the change, compared to no-change trials. Reaction times for  
435 *blind* trials were also significantly slower than no-change trials ( $0.617 \pm 0.176$  s),  $t(19) =$   
436  $-3.613, p = .002, g_{rm} = 0.25$ . Therefore, despite being *blind* to the change, the presence

437 of a change in the display increased reaction times, particularly for trials where the  
438 participant was uncertain.

439 We found a significant effect of location of the changed item (outside/central) on  
440 awareness (*blind/localise/sense*),  $\chi^2(2) = 26.68, p < .001$ , as participants were more likely  
441 to be *blind* to the change when it occurred on the outside of the display (*blind* outside:  
442 911 trials, central: 619). There were also a greater number of *sense* trials for outside  
443 changes, suggesting that these changes may be harder to localise than central changes  
444 (*sense* outside: 290 trials, central: 220). The location had the least influence on *localise*  
445 trials (*localise* outside: 627, central: 619).

446 The hemisphere of the display in which the change occurred (left/right) had no  
447 significant effect on participant awareness (*blind/localise/sense*),  $\chi^2(2) = 4.941, p = .085$   
448 (*blind* left: 781 trials, right: 749; *localise* left: 651, right: 607; *sense* left: 236, right 276).  
449 Additional behavioural analysis and results can be found in the supplementary material.

## 450 EEG Results

### 451 P1 and N1

452 For P1 amplitudes, the main effect of awareness was not significant,  $F(2, 38) =$   
453  $.568, p = .572, \eta^2 = .029$ . Display was also not significant,  $F(1, 19) = .143, p = .709, \eta^2 =$   
454  $.007$ . The interaction between awareness and display was not significant,  $F(2, 38) =$   
455  $3.250, p = .050, \eta^2 = .146$  (figure 2). (*Blind* first display  $M = 1.933, SD = 4.106$ , second  
456  $M = 1.401, SD = 5.052$ ; *localise* first  $M = 0.606, SD = 2.706$ , second  $M = 1.108, SD =$   
457  $5.858$ ; *sense* first  $M = 0.509, SD = 2.738$ , second  $M = 2.020, SD = 5.900$ .)

458 For the N1, the main effect of awareness was not significant,  $F(2, 38) = 2.008, p =$   
459  $.148, \eta^2 = .096$ . Display was also not significant,  $F(1, 19) = .68, p = .797, \eta^2 = .004$ , nor  
460 was the interaction between awareness and display,  $F(2, 38) = 2.046, p = .143, \eta^2 = .097$   
461 (figure 2). (*Blind* first display  $M = -1.526, SD = 4.096$ , second  $M = -2.178, SD =$   
462  $4.469$ ; *localise* first  $M = -3.609, SD = 4.246$ , second  $M = -2.783, SD = 5.658$ ; *sense*  
463 first  $M = -3.500, SD = 3.662$ , second  $M = -2.881, SD = 5.279$ .)

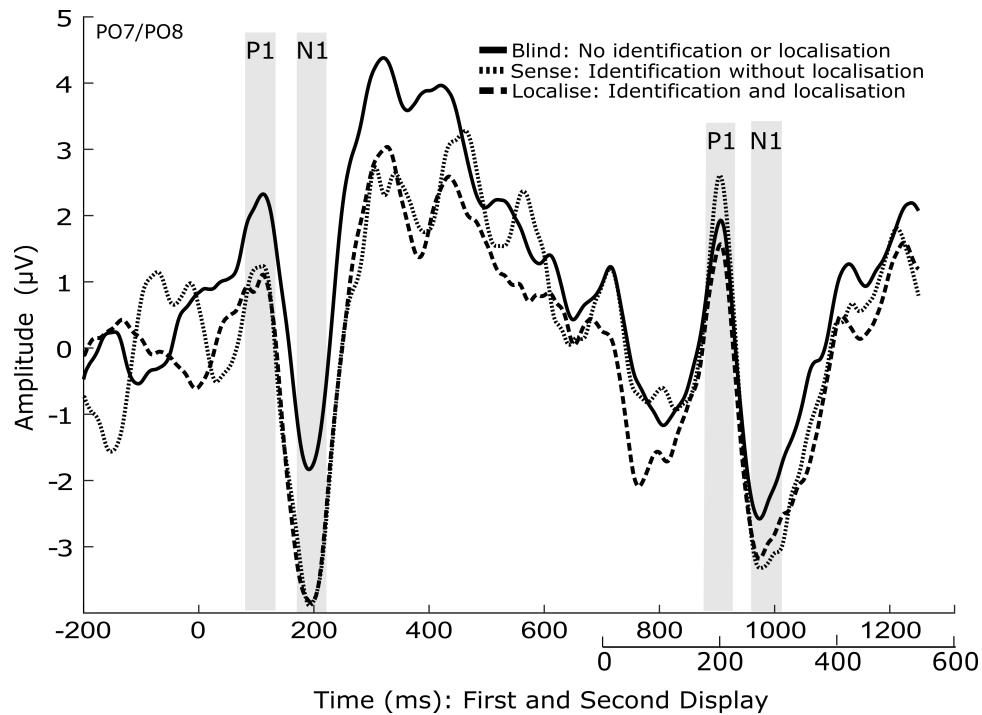

Figure 2. ERP plot showing the mean of electrodes PO7 and PO8, for each awareness condition. Condition means for the values within the shaded time windows were used for ERP analysis.

#### 464 N2pc

465 The main effect of hemisphere on N2pc amplitudes was not significant,  $F(1, 19) =$   
466  $.338, p = .568, \eta^2 = .018$ , nor was the main effect of awareness,  $F(2, 38) = .878, p = .424,$   
467  $\eta^2 = .044$ . The interaction was not significant,  $F(2, 38) = .572, p = .569, \eta^2 = .029$ .

468 As we had strong hypotheses about the presence of an N2pc for *localise* trials,  
469 we also ran corrected post-hoc pairwise comparisons across awareness levels. A signifi-  
470 cantly increased negativity across both hemispheres was found for *localise* trials ( $M =$   
471  $-1.573, SD = 4.378$ ) compared to *blind* ( $M = -.810, SD = 4.856$ )  $p = .038$ . *Blind* and  
472 *sense* ( $M = -1.720, SD = 5.444$ ) were not significantly different,  $p = .259$ , nor were  
473 *sense* and *localise*,  $p = .862$ .

#### 474 Visual Awareness Negativity (VAN)

475 The main effect of awareness on the VAN was not significant  $F(2, 38) = .029, p =$   
476  $.971, \eta^2 = .002$ . (*Blind*  $M = 0.059, SD = 3.427$ , *localise*  $M = 0.184, SD = 3.093$ , *sense*

477  $M = 0.104, SD = 3.295.$ )

### 478 Late Positivity (LP)

479 There was a main effect of awareness on LP amplitudes  $F(2, 38) = 3.776, p = .032,$   
480  $\eta^2 = .166.$  In corrected post-hoc comparisons, *localise* trials ( $M = 2.270, SD = 4.130$ )  
481 had a significantly greater LP amplitude than *blind* ( $M = .032, SD = 2.158$ ),  $p = .024.$   
482 However, *sense* ( $M = 1.069, SD = 3.801$ ) was not significantly different to *blind*,  $p = .130,$   
483 or *localise* trials,  $p = .174$  (figure 3).

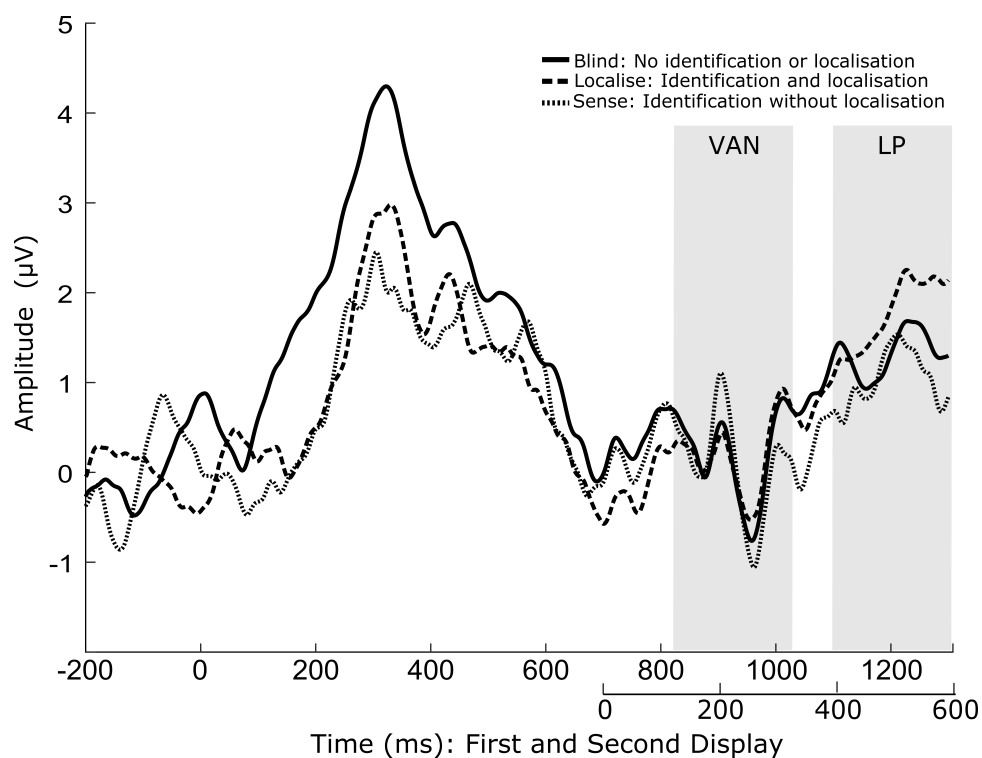

Figure 3. ERP plot showing a mean of electrodes Cz, CPz, and Pz, for each awareness condition. Condition means for the values within the shaded time window were used for ERP analysis.

484

## fMRI Results

### 485 Awareness

486 For the contrast *localise*>*blind*, increased BOLD activation was found in the bi-  
487 lateral occipital cortex (BA17/V1, BA18/V2, and hOC4v/V4), bilateral parietal cortex

488 (BA40/PFt, BA3b, BA2), left putamen (BA49), left fusiform gyrus (BA37), right insula  
489 (BA13), right pre-motor cortex (BA6, spanning middle frontal, superior frontal, and pre-  
490 central gyri), (see figure 4 for significant clusters, figure 5 for a map of t-scores, and table  
491 1 for additional values).

492 For the contrast *sense*>*blind*, increased activation was found in bilateral occipital  
493 cortex (BA17/V1, BA18/V2), left pre-motor cortex (BA6, spanning middle frontal, su-  
494 perior frontal, and precentral gyri), superior medial gyrus (BA8), parietal cortex (BA40,  
495 BA7/hIP3), and left anterior cingulate cortex (BA32), (see figure 6 for significant clusters,  
496 figure 7 for a map of t-scores, and table 2 for additional values).

497 We also looked for any activation that was significantly greater in one contrast  
498 than the other (*localise*>*blind* vs. *sense*>*blind*). However, no significant activations  
499 remained after correction for multiple comparisons. No voxels survived for the following  
500 contrasts; *localise*>*sense*, *sense*>*localise*, *blind*>no change, *sense*>*false alarm*, or *false*  
501 *alarm*>*sense*.

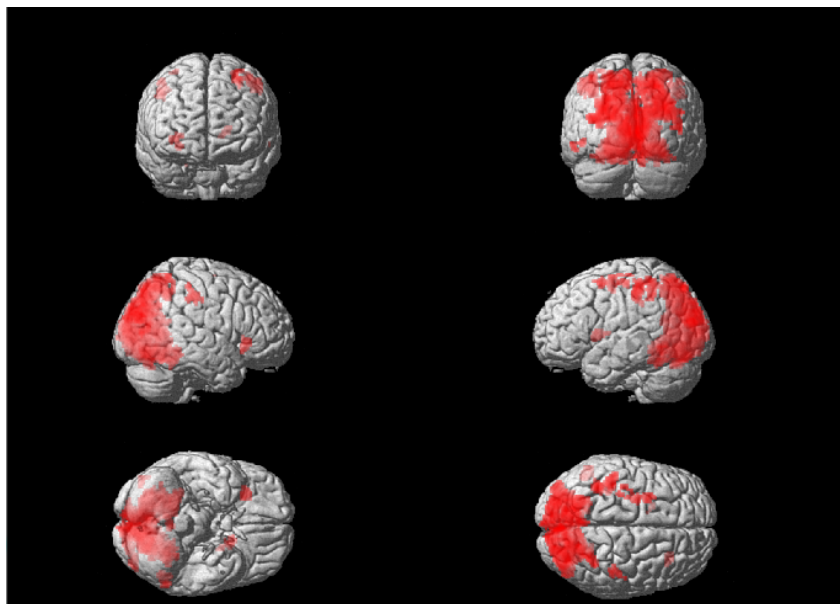

*Figure 4.* Voxels activated for the contrast *localise* > *blind* trials. Multiple comparisons were controlled using a cluster level family wise error correction where  $p < .001$ , as well as a minimum cluster size of 20 voxels.

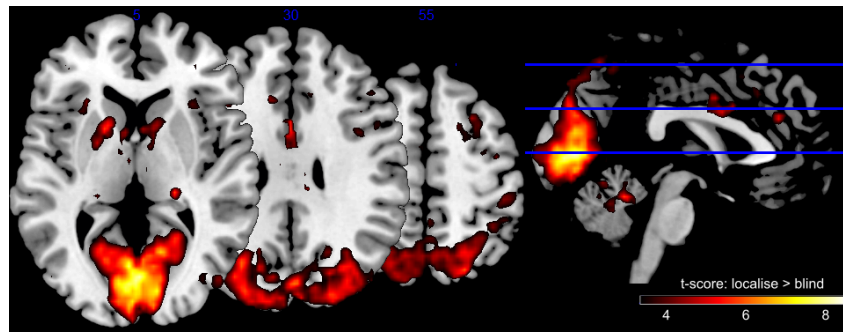

Figure 5. T-scores for the contrast *localise* > *blind* trials, thresholded at a minimum  $t = 3$ .

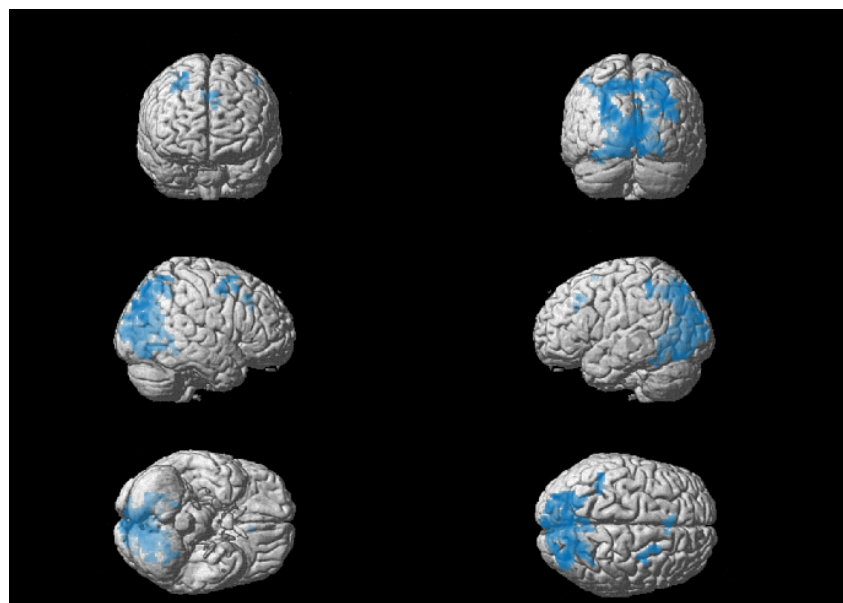

Figure 6. Voxels activated for the contrast *sense* > *blind* trials. Multiple comparisons were controlled using a cluster level family wise error correction where  $p < .001$ , as well as a minimum cluster size of 20 voxels.

## 502 Post-hoc conjunction analysis

503 Given that the contrasts *localise* vs *blind* and *sense* vs *blind* revealed similar net-  
504 works of activation, we ran a conjunction analysis to determine which voxels were sig-  
505 nificantly activated in both contrasts (note that this analysis was not included in our  
506 pre-registration). To do this, we entered the two first-level contrasts for each participant  
507 into an ANOVA at the second-level (independence not assumed). We then ran a con-  
508 junction analysis across both contrasts to identify common voxels, using the conjunction

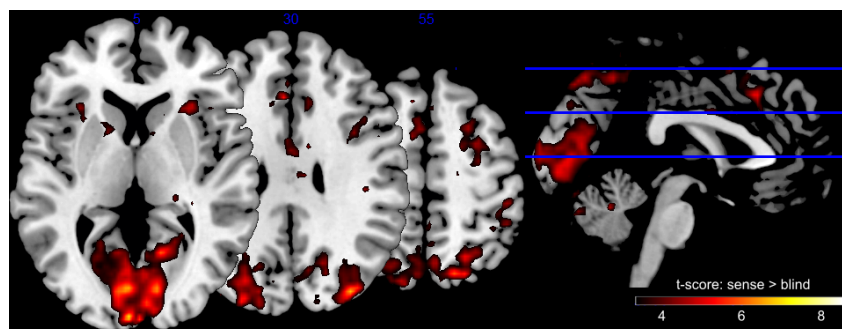

Figure 7. T-scores for the contrast sense > blind trials, thresholded at a minimum  $t = 3$ .

509 null hypothesis as suggested in Nichols et al. (2005). Significant activation was identified  
510 in the visual cortex (BA18, BA19) and inferior parietal cortex (BA7, BA39) (see table 5  
511 and figure 8).

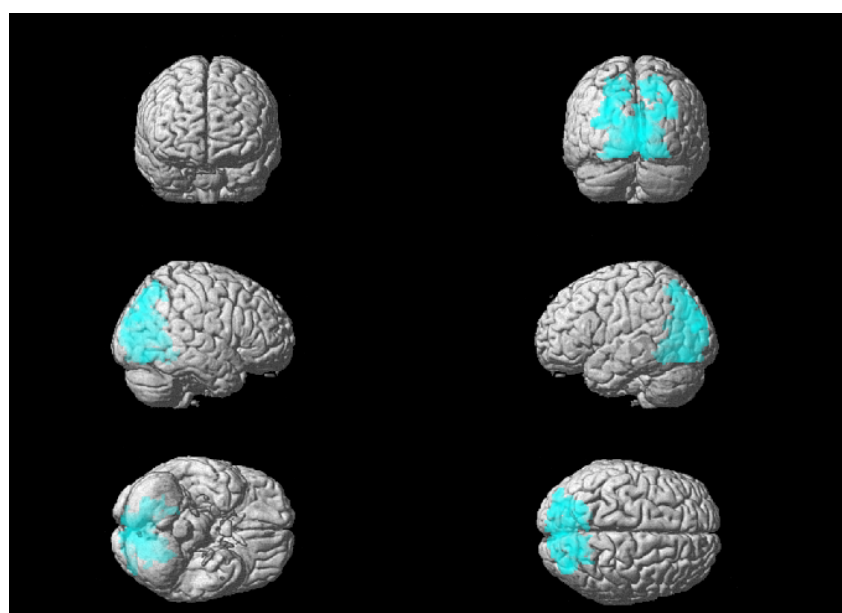

Figure 8. Conjunction analysis: voxels significantly activated for both *localise*>*blind* and *sense*>*blind* contrasts. Multiple comparisons were controlled using a cluster level family wise error correction where  $p < .001$ , as well as a minimum cluster size of 20 voxels.



## 512 **Difficulty and Certainty**

513 The parametric regressor of participant certainty revealed significant activation  
514 in the right visual cortex (BA17/V1, BA18/V2) and right parietal cortex (BA40). The  
515 parametric regressor of task difficulty (the number of squares presented per trial) revealed  
516 significant activation in the left visual cortex (BA18, V2).

## 517 **ERP-informed fMRI**

518 No significant voxels were identified for the LP-informed fMRI analysis using either  
519 method for extracting the single trial values.

## 520 **Discussion**

521 The main aim of this change blindness experiment was to distinguish between trials  
522 in which participants could both detect and localise a change in coloured square (*localise*),  
523 versus those in which they could only detect it (*sense*), or not detect it at all (*blind*), using  
524 combined EEG-fMRI. In the EEG data, the late parietal positivity ERP, *localise* trials  
525 were significantly higher in amplitude than *blind* trials as previously found (Scrivener  
526 et al., 2019), but *sense* trials were not distinguishable from those where participants were  
527 *blind* to the change. Similarly, no differences were found between *sense* and *blind* trials  
528 in the N2pc or VAN. It is not clear whether this is due to false positive findings in the  
529 previous study, the smaller signal to noise ratio in the combined EEG-fMRI data, or the  
530 relatively small sample size. The fMRI results revealed significant differences in BOLD  
531 activation for both *localise* and *sense* trials when compared to *blind*, suggesting that they  
532 are separable to trials where participants were completely unaware of the change. These  
533 results suggest that the *sense* condition may be distinguishable from the traditional *blind*  
534 condition, meaning that subjects may have access to more information when they are able  
535 to *sense* a change. However, the contrast between *localise* and *sense* conditions revealed  
536 no significant activations, and a conjunction analysis revealed overlapping activation in  
537 visual and parietal regions. These two levels of awareness may therefore be associated with  
538 activation within a similar network, and the link between brain activity and behavioural

539 differences remains unclear.

## 540 Behavioural

541 One explanation for the presence of a *sense* condition in change blindness is that  
542 it reflects a liberal response criteria, such that participants report seeing a change even  
543 though they were not certain that it occurred (Simons & Ambinder, 2005). In other  
544 words, they make a '*false alarm*' during change trials. If this is the case, then these trials  
545 may be similar in number to *false alarm* trials, where participants incorrectly report a  
546 change for identical displays where they could not have seen a change. We found that par-  
547 ticipants had fewer *false alarms* than *sense* trial, and the percentage of these trials across  
548 participants was not correlated. This suggests that *sense* trials cannot be attributed to  
549 a liberal response criterion of the participants, as the tendency of participants to make  
550 a *false alarm* did not influence the number of times they could *sense* a change. How-  
551 ever, this differs from previous results, where a significant correlation was found in the  
552 percentage of the two trial types (Scrivener et al., 2019). Further behavioural data may  
553 therefore be needed to confirm this relationship.

554 Previous studies have also reported that participants responded 'no change' more  
555 quickly for no-change trials, compared to change trials (Williams & Simons, 2000; Mitroff  
556 et al., 2004). The participant's response is the same in both trial types, but the presence  
557 of a change is different. This suggests that even when they fail to detect the change in  
558 a change trial, they take longer to respond. We therefore compared reaction times for  
559 no-change trials and *blind* trials. Out of the 20 participants, 15 were slower to respond  
560 when they were blind to the change, compared to no-change trials. Reaction times for  
561 *blind* trials were also significantly slower than no-change trials, meaning that even when  
562 participants did not notice the change, its presence increased their reaction times. It is  
563 possible that in *blind* trials, some information may be available to the participant, leading  
564 to slower reaction times, but not enough for them to be confident to report the change.

565 The location of the square that changed in colour during the experiment had a  
566 significant influence on the likelihood that the change was detected; changes closer to

577 the central fixation were detected at a higher frequency across participants than those  
578 further away. One explanation is that the participants were asked to fixate at the centre  
579 of the screen, and therefore their overt attention was directed here during the trial. As  
570 attention has been found to correlate with change detection, this finding is not surprising  
571 (Rensink et al., 1997).

## 572 EEG

573 For the late parietal positivity ERP, *localise* trials were significantly higher in am-  
574 plitude than *blind* trials. Other studies have also reported increased LP amplitudes for  
575 detected versus undetected changes (Fernandez-Duque & Thornton, 2003; Busch et al.,  
576 2010), which has been suggested to reflect conscious awareness of changes (Railo et al.,  
577 2011) and participant confidence (Eimer & Mazza, 2005). However, *sense* trials were not  
578 distinguishable from trials where participants were *blind* to the change. This contradicts  
579 our own results from a previous study where all three awareness conditions were distin-  
580 guishable within the LP (Scrivener et al., 2019). There is therefore increasing evidence  
581 that the LP varies reliably between detected versus undetected changes, but whether it  
582 can be detected during *sense* trials is unclear. Note that the presence of a significant LP  
583 for *localise*, but not for *sense*, should not be used as evidence that the two are different  
584 as the post-hoc comparison was not statistically significant.

585 For the N2pc results, it should be emphasised that the main effect of hemisphere  
586 was not significant. Therefore, the post-hoc comparison in amplitude between *localise*  
587 and *blind* trials does not reflect the traditional asymmetry of the N2pc component, with  
588 a greater negativity in the contralateral hemisphere. It can only be concluded that there  
589 was an increased negativity for *localise* trials across both hemispheres, and may be better  
590 interpreted as an N2 component. This is a common finding, and in a review of the  
591 ERP correlates of visual awareness (Koivisto & Revonsuo, 2010) the majority of change  
592 blindness paper reported enhanced negativity in the N1-N2 range for detected changes  
593 (with the exception of Fernandez-Duque et al., 2003 and Neideggen et al., 2001).

594 In a previous EEG study we did find a significant N2pc for both *localise* and *sense*

595 conditions, including a significant main effect of hemisphere (Scrivener et al., 2019). We  
596 concluded that the presence of an N2pc for both awareness conditions indicated a shift  
597 in attention towards the hemisphere of the change (Luck & Ford, 1998), but that this  
598 shift in attention was not sufficient to facilitate correct localisation in *sense* trials. In this  
599 experiment, we failed to find any evidence for this shift in either awareness condition, as  
600 characterised by the N2pc.

601 We found no statistically significant effects of awareness in the P1, N1, or VAN ERP  
602 analysis, similar to our previous results (Scrivener et al., 2019). In a recent review of the  
603 ERPs associated with visual awareness (Förster et al., 2020), the authors concluded that  
604 early P1 and N1 peaks are unlikely to be the earliest signature of visual awareness, and  
605 no longer discuss these peaks as possible candidates. This is due to increasing evidence  
606 against their association with conscious detection, which our findings support. However,  
607 they argue that the VAN is the most likely candidate for a marker of conscious detection,  
608 and our results are contrary to several previous findings. One possible explanation is  
609 the difference in experimental paradigm. In many cases, awareness is modulated by the  
610 perceptual difficulty of the stimuli, for example by the contrast. However, the stimuli in  
611 a change blindness paradigm remain at the same contrast across all trials, and difficulty  
612 is instead modulated by the number of distractors. Another suggestion from our previous  
613 work (Scrivener et al., 2019) is that the VAN requires both the location and identity of an  
614 object to be stored, such that it is available for conscious report. As our participants were  
615 not able to identify the location of the change in the *sense* condition, this may explain  
616 the lack of significant VAN ERP.

## 617 **fMRI**

618 **Awareness.** One aim of this experiment was to improve our knowledge of the  
619 neurological basis of the *sense* condition with the addition of fMRI results. We found  
620 largely overlapping activation for both *localise* and *sense* conditions when contrasted with  
621 trials where participants were *blind* to the change in coloured square. Both awareness  
622 conditions had significantly greater activation in the early visual cortex (B18, V2), the left

623 supramarginal gyrus in the inferior parietal lobe (BA40), and the left pre-motor cortex  
624 (BA6).

625 The posterior parietal cortex and early visual cortex are commonly implicated as  
626 storage sites for the contents of visual working memory (Todd and Marois, 2004; Edin  
627 2009; D'Esposito 2015), and previous fMRI studies of change detection also found acti-  
628 vations in these areas (Beck et al., 2001; Pessoa, 2004). Using MVPA, Christophel et al  
629 (2012) identified stimuli-specific information contained in both early visual and posterior  
630 parietal areas (around the intraparietal sulcus), further implicating these regions as stor-  
631 age sites for visual representations. The activation of these visual and parietal regions in  
632 both *localise* and *sense* conditions suggests the presence of visual representations of the  
633 stimuli for both levels of awareness. This supports the hypothesis that change blindness  
634 may arise from a failure to compare two displays or images, rather than a failure to encode  
635 the visual information (Simons et al., 2005; Hollingworth et al., 2001). Therefore, the  
636 inability of participants to localise the change during *sense* trials may not be explained  
637 by a lack of parietal representation, as activity in the dorsal stream (BA18 and BA40)  
638 was greater than during *blind* trials.

639 Activation found only in the *localise* contrast (but not for *sense*) were located in  
640 the primary sensory cortex (BA2, BA3b), putamen (BA49), and insula (BA13). This  
641 forms a wider network of activation than the *sense* versus *blind* contrast, including mid-  
642 brain structures. The insula and putamen are both hypothesised to act as hubs in key  
643 brain networks relating to cognitive control, and their activation specific to *localise* trials  
644 may indicate their role in facilitating full awareness of the change. More specifically,  
645 the insula forms an integrative hub between attention and salience networks (Menon  
646 & Uddin, 2010; Eckert et al., 2009), balancing external attentional cues with internal  
647 performance monitoring (Uddin et al., 2017). In contrast, the putamen is suggested to be  
648 a central component of a frontal-subcortical network (including the superior parietal and  
649 premotor cortex) related to cognitive control (van Belle et al., 2014), and has anatomical  
650 connections with rostral parietal areas (Jarbo & Verstynen, 2015). Further, patients with  
651 putamen lesions show symptoms of left-sided neglect (Karnath & Rorden, 2012), which

652 is often thought of as a disorder of attention.

653 Overall, the pattern of findings indicates both anatomical and functional links  
654 between the putamen/insula and parietal cortex, which may explain their increased ac-  
655 tivation during *localise* trials. However, it should be noted that our fMRI sequence  
656 parameters were not specifically designed for accurate recording of mid-brain structures,  
657 which may influence the reliability of these results (Eapen et al., 2011).

658 Activation in the anterior cingulate cortex (ACC) was found in the *sense* versus  
659 *blind* contrast. The ACC is commonly linked to functional networks underlying attention  
660 (Ungerleider, 2000), and more specifically in boosting attention towards task-relevant  
661 stimuli (Orr & Weissman, 2009; Kim et al., 2016). Further, Mitchell and Cusack (2008)  
662 found ACC activation that correlated with estimates of the number of items stored by each  
663 participant during a working memory task. If this activation reflects increased attention  
664 towards the changed stimuli, then it would be expected to occur in both awareness  
665 conditions, as attention facilitates change detection (Rensink et al., 1997). However, ACC  
666 activation was not found in the *localise* condition, and therefore may not be necessary  
667 for full awareness of the change.

668 A more fitting explanation of the ACC activation specific to the the *sense* condition  
669 is that it reflects error processing during the task. This is because *sense* trials contained  
670 a response error, where participants incorrectly localised the change. Using combined  
671 EEG-fMRI, ACC activation has been linked to error processing and is correlated with  
672 the error related negativity (ERN) in EEG (Iannaccone et al., 2015; Debener, 2005).  
673 Activity in this area could therefore relate to the incorrect responses of the participants  
674 during *sense* trials. However, it should be noted that activation in the ACC is found for  
675 a wide range of tasks and the specificity of this activation is debated (Dehaene, 2018).

676 It could be argued that *blind* trials also contain a response error, as the participant  
677 failed to report a change that did occur. This should therefore also activate the ACC,  
678 if ACC activation reflects error monitoring (and that this error monitoring need not be  
679 conscious). Compared to *blind* trials, *sense* trials contained activation in visual (BA18)  
680 and parietal (BA40) areas, and the participant correctly reported the change. However, it

681 is also possible that the ACC activation relates to the participant's awareness of their own  
682 failure to localise the change, which is not relevant to *blind* trials where the participant  
683 can be very confident that no change occurred. Further, the ACC activation during *sense*  
684 trials could reflect a mismatch between the intended response and the actual response  
685 (Dehaene, 2018). Although participants had represented the stimuli in visual working  
686 memory (indexed by the increased visual and parietal activation that was similar to  
687 *localise* trials), and planned the correct response, their actual response did not match their  
688 intended one leading to ACC activation. In *blind* trials, participants had significantly  
689 reduced visual and parietal activation, and may not have known which response was  
690 correct. Therefore, this mismatch between intended correct response and actual response  
691 did not occur. While this may explain our results, this is currently a working theory that  
692 should be explored in further research.

693 In relation to theories of visual consciousness, our results could be interpreted in  
694 support for the 'partial awareness hypothesis' given the distinction in fMRI between *blind*  
695 and *sense* trials. Although participants were aware of the change during *sense* trials,  
696 their inability to provide further information suggests a less detailed representation of  
697 the visual display. Further, *localise* trials were associated with similar activity to *sense*  
698 in visual and parietal areas, perhaps reflecting activity relating to the 'all-or-nothing'  
699 ignition of change detection. However, the additional activation related to *localise* trials  
700 may characterise an improved representation that facilitated correct localisation. This  
701 hypothesis is highly speculative, and clarity is needed on the distinction between *localise*  
702 and *sense* conditions. For example, with future work using MVPA it would be possible to  
703 determine if the pattern of information stored within the brain is similar between these  
704 two levels of awareness. This would provide more information regarding the nature of  
705 stored representations during the task, and identify regions where these representations  
706 differ. Given the behavioural and phenomenological differences between *localise* and *sense*  
707 trials, it is reasonable to expect that somewhere in the brain should contain differing  
708 representations for these two levels of awareness, and therefore be driving the variation  
709 in participant response.

710       **Difficulty and certainty.** Using participant certainty at each trial as a para-  
711 metric regressor, we found significant activations in the right visual cortex (BA18, V2)  
712 and bilateral supramarginal gyrus (BA40). These regions were also found to increase  
713 with awareness of the change (*localise* and *sense* trials), possibly due to the relation-  
714 ship between awareness and certainty. Specifically, when participants were aware of the  
715 change and could localise it correctly, they were likely to report higher certainty in their  
716 responses.

717       The parametric regressor of task difficulty (the number of squares presented per  
718 trial) revealed significant activation in the visual cortex (BA18, V2). This finding likely  
719 reflects the greater visual stimulation associated with a more complex visual array. In  
720 previous literature, parietal activity has also been correlated with set size and the number  
721 of objects stored in visual working memory (Mitchell & Cusack, 2008). Activity also  
722 predicts individual differences in working memory capacity (Vogel & Machizawa, 2004).  
723 We failed to find this effect, which may be explained by the variation in set sizes that were  
724 presented across participants. Instead of presenting a number of blocks with a number  
725 of difficulty levels, the difficulty was modulated in real time depending on participant  
726 performance. Also, the change in response may not be linear in our case; during easy  
727 trials, the response may scale linearly with the number of trials, until the maximum  
728 capacity of the participant is reached. Past this point, the number of items may exceed  
729 the capacity, and therefore fail to be represented or modulate the brain activation in these  
730 regions.

### 731 **ERP-informed fMRI**

732       Our pre-registered analysis method of LP-informed fMRI revealed no significant  
733 results. We therefore failed to identify voxels with activation that significantly co-varied  
734 with fluctuations in the EEG. It is acknowledged that EEG-BOLD couplings are weak, as  
735 they measure the effects remaining after the mean evoked BOLD responses are explained  
736 (Liu et al., 2016). However, previous combined EEG-fMRI experiments have managed to  
737 identify correlates of EEG using ERP-informed fMRI (Debener, 2005; Eimer & Mazza,



738 2005), even if at liberal correction thresholds.

739 One possible reason for the failure to find significant ERP-informed BOLD effects  
740 is the reduced signal to noise in EEG signals recorded inside the MRI environment. A  
741 second possibility is the method that we used to quantify single-trial ERPs. There is  
742 no single method for ERP-informed fMRI analysis, and we therefore chose to run two  
743 separate analysis pipelines in case of disparaging results. In the first, we used raw values  
744 from the EEG time series. This method is susceptible to noise artifacts, and any trials in  
745 which the noise signal is greater than the neurological signal of interest will reduce the  
746 chance of observing an effect across conditions. Given the increased number of artifacts  
747 in EEG-fMRI data, and the absence of perfect artifact removal routines, it is possible  
748 that the signal to noise ratio was too small in the raw single-trial ERP values.

749 In the second method, we used ICA to identify components matching our ERP of  
750 interest, with the hypothesis that noise signals would have a reduced contribution to the  
751 single trial values extracted from this component (Debener, 2005; Wirsich et al., 2014).  
752 However, this method also produced null results in ERP-informed fMRI analysis. A  
753 downside to this method is that its success is dependent on a) the algorithm accurately  
754 separating independent components, and b) the correct selection of the components con-  
755 taining the ERP of interest. Other possible processing steps used in ERP-informed fMRI  
756 include linear classifiers (Walz et al., 2015; Goldman et al., 2009), autoregressive mod-  
757 els (Nguyen et al., 2014), and spatial laplacian filters (Liu et al., 2016), to name only  
758 a few. However, it is not within the scope of our pre-registered analysis to adjust the  
759 pre-processing or analysis steps any further.

## 760 **Conclusions**

761 Overall, one of the main aims of this experiment was to establish if the *sense*  
762 condition is separable from other awareness conditions in neural signals, as measured  
763 using EEG and fMRI. While the phenomenological experience of *sensing* differs from  
764 full awareness, it remains unclear whether this arises from a distinct state of neural  
765 activation, or whether these trials can be explained by explicit behavioural mechanisms

766 such as participant response errors or lack of confidence. The strongest evidence presented  
767 here is the difference in fMRI activation for *blind* trials compared to *sense* trials. Across  
768 our sample, there was a greater spread of activation within areas such as the early visual  
769 cortex and inferior parietal sulcus when participants suspected a change, compared to  
770 when they missed it completely. This suggests that *sense* trials were measurably different  
771 to *blind* trials, and that participants did have access to more information regarding the  
772 change.

773 However, the contrast between *sense* and *localise* trials, where participants had full  
774 awareness, revealed no significant differences in activation. Additionally, the conjunction  
775 analysis revealed an overlapping occipitoparietal network of activation for these two levels  
776 of awareness. This suggests common activity related to the awareness of the change itself.  
777 In line with the ‘partial awareness hypothesis’, it may be that a degraded representation  
778 of the visual display within these regions contributed to failed localisation during *sense*  
779 trials.

780 While we attempted to distinguish between true *sense* trials and *localise* trials  
781 with an error using participant certainty, the number of *sense certain* responses was low.  
782 This meant that dividing the awareness conditions into certain/uncertain for EEG or  
783 fMRI analysis was not feasible. Future experiments could focus on obtaining higher trial  
784 numbers, which would hopefully facilitate this analysis. However, the very nature of the  
785 *sense* condition means that participants are unlikely to be ‘certain’ during many of the  
786 trials. One way around this would be to include a response option for participants to  
787 indicate if they think that they made a response error, although this would only identify  
788 trials where the participants were aware of their mistake.

789 In summary, our data suggests that the phenomenological experience of *sensing*  
790 a change is associated with increased activity in visual, parietal, and anterior circulate  
791 cortices, when compared to change blind trials. Given this increased activation including  
792 areas that are commonly implicated as the storage sites of visual working memory, we  
793 argue that *sensing* may not be caused by a lack of representation of the visual display.  
794 Instead, *sensing* may reflect unsuccessful comparison of the two displays (Simons et al.,

795 2005; Hollingworth et al., 2001), or a degraded representation that prevents accurate  
796 localisation of the change in space.

| Brain Region             | BA         | Hemisphere | Cluster size | MNI Coordinates |     |     | Z Score | T (peak level) | Cluster level FWE (p) |
|--------------------------|------------|------------|--------------|-----------------|-----|-----|---------|----------------|-----------------------|
|                          |            |            |              | x               | y   | z   |         |                |                       |
| Lingual gyrus            | 17         | Right      | 12408        | 4               | -82 | -2  | 5.36    | 9.64           | <.001                 |
|                          | 18 (hOC4v) | Left       |              | -22             | -70 | -6  |         |                |                       |
|                          | 18         | Left       |              | -6              | -76 | 0   |         |                |                       |
| Inferior parietal cortex | 40 (PFt)   | Left       | 421          | -38             | -30 | 42  | 4.71    | 7.33           | <.001                 |
| Postcentral gyrus        | 3b         | Left       |              | -44             | -30 | 52  |         |                |                       |
|                          | 2          | Left       |              | -40             | -42 | 58  |         |                |                       |
| Putamen                  | 49         | Left       | 90           | -18             | 8   | 8   | 4.25    | 6.08           | <.001                 |
|                          |            |            |              | -22             | 0   | 6   |         |                |                       |
| Middle frontal gyrus     | 6          | Left       | 182          | -28             | 4   | 56  | 4.18    | 5.89           | <.001                 |
| Superior frontal gyrus   | 6          | Left       |              | -26             | -6  | 60  |         |                |                       |
| Precentral gyrus         | 6          | Left       |              | -30             | -22 | 64  |         |                |                       |
| Insula                   | 13         | Right      | 96           | 28              | 22  | -10 | 4.08    | 5.66           | <.001                 |
|                          |            |            |              | 32              | 28  | -2  |         |                |                       |
|                          |            |            |              | 26              | 24  | 2   |         |                |                       |
| Inferior temporal gyrus  | 39         | Left       | 84           | -56             | -56 | 12  | 3.71    | 4.87           | <.001                 |
| Middle temporal gyrus    | 37         | Left       |              | -48             | -58 | -4  |         |                |                       |
|                          |            |            |              | -60             | -52 | -6  |         |                |                       |
| Inferior parietal cortex | 40 (PFt)   | Right      | 110          | 44              | -24 | 38  | 3.62    | 4.69           | <.001                 |
| Postcentral gyrus        | 3b         | Right      |              | 50              | -18 | 40  |         |                |                       |
|                          |            |            |              | 40              | -28 | 46  |         |                |                       |

Table 1

*Voxels significantly activated for the contrast localise > blind, cluster FWE p < .001, minimum 20 voxels.*

797

## Acknowledgements

798

799

800

801

802

Thank you to Arran Reader, David Scrivener, and Zola Dean for their valuable comments on the manuscript, and to Isil Bilgin and Sophie Szymkowiak for their help with data collection. Thank you also to Maximilian Zangs for his help with the initial version of the experimental paradigm script. This research was funded by the EPSRC, EP/1503705 DTG 2014/2015.

| Brain Region             | BA       | Hemisphere | Cluster size | MNI Coordinates |     |    | Z Score | T (peak level) | Cluster level FWE (p) |
|--------------------------|----------|------------|--------------|-----------------|-----|----|---------|----------------|-----------------------|
|                          |          |            |              | x               | y   | z  |         |                |                       |
| Precentral gyrus         | 6        | Right      | 145          | 32              | -4  | 48 | 4.94    | 8.07           | <.001                 |
| Middle frontal gyrus     | 6        | Right      |              | 24              | 16  | 50 |         |                |                       |
| Superior frontal gyrus   | 6        | Right      |              | 24              | 8   | 60 |         |                |                       |
| Calcarine gyrus          | 17       | Left       | 5526         | -4              | -96 | 4  | 4.92    | 8              | <.001                 |
|                          | 18       | Right      |              | 12              | -72 | 10 |         |                |                       |
| Lingual gyrus            | 17       | Left       |              | -6              | -82 | 2  |         |                |                       |
| Superior medial gyrus    | 8        | Left       | 88           | -2              | 26  | 0  | 3.96    | 5.38           | <.001                 |
| Anterior cingulate gyrus | 24       | Left       |              | -4              | 28  | 30 |         |                |                       |
| Superior medial gyrus    | 8        | Right      |              | 8               | 24  | 42 |         |                |                       |
| Inferior parietal sulcus | 40       | Left       | 87           | -48             | -42 | 56 | 3.67    | 4.78           | <.001                 |
|                          | 7 (hIP3) | Left       |              | -32             | -48 | 49 |         |                |                       |
|                          | 40       | Left       |              | -40             | -44 | 50 |         |                |                       |

Table 2

*Voxels significantly activated for the contrast sense > blind, cluster FWE p < .001, minimum 20 voxels.*

803

### Conflict of Interest Statement

804

The authors declare that the research was conducted in the absence of any commercial or financial relationships that could be construed as a potential conflict of interest.

805

806

### Data Accessibility Statement

807

The raw data, pre-processed data, and analysis scripts can be found on the Open Science Framework: <https://doi.org/10.17605/OSF.IO/W6BH3>

808

| Brain Region             | BA | Hemisphere | Cluster size | MNI Coordinates |     |    | Z Score | T (peak level) | Cluster level FWE (p) |
|--------------------------|----|------------|--------------|-----------------|-----|----|---------|----------------|-----------------------|
|                          |    |            |              | x               | y   | z  |         |                |                       |
| Lingual gyrus            | 18 | Right      | 160          | 14              | -74 | 0  | 4.11    | 5.74           | <.001                 |
| Calcarine gyrus          | 17 | Right      |              | 6               | -82 | 8  |         |                |                       |
|                          |    |            |              | 10              | -88 | 12 |         |                |                       |
| Inferior parietal cortex | 40 | Right      | 104          | 50              | -34 | 48 | 3.84    | 5.12           | <.001                 |
|                          |    |            |              | 48              | -42 | 48 |         |                |                       |
|                          |    |            |              | 60              | -34 | 34 |         |                |                       |

Table 3

*Parametric regressor: participant certainty, cluster FWE  $p < .001$ , minimum 20 voxels.*

| Brain Region  | BA | Hemisphere | Cluster size | MNI Coordinates |     |     | Z Score | T (peak level) | Cluster level FWE (p) |
|---------------|----|------------|--------------|-----------------|-----|-----|---------|----------------|-----------------------|
|               |    |            |              | x               | y   | z   |         |                |                       |
| Lingual gyrus | 18 | Left       | 69           | -16             | -92 | -6  | 4.23    | 6.02           | 0.003                 |
|               |    |            |              | -10             | -86 | -12 |         |                |                       |

Table 4

*Parametric regressor: task difficulty, cluster FWE  $p < .001$ , minimum 20 voxels.*

| Brain Region             | BA | Hemisphere | Cluster size | MNI Coordinates |     |     | Z Score | T (peak level) | Cluster level FWE (p) |
|--------------------------|----|------------|--------------|-----------------|-----|-----|---------|----------------|-----------------------|
|                          |    |            |              | x               | y   | z   |         |                |                       |
| Lingual gyrus            | 18 | Left       | 6116         | -4              | -70 | 6   | 5.51    | 7.35           | <.001                 |
|                          |    |            |              | -4              | -80 | -8  |         |                |                       |
|                          |    |            |              | -18             | -72 | -10 |         |                |                       |
| Inferior parietal cortex | 7  | Right      | 445          | 28              | -76 | 44  | 4.91    | 6.16           | <.001                 |
| Occipital cortex         | 19 | Right      |              | 22              | -90 | 22  |         |                |                       |
| Inferior parietal cortex | 39 | Right      |              | 34              | -76 | 38  |         |                |                       |
| Inferior parietal cortex | 7  | Right      | 421          | 18              | -70 | 42  | 4.73    | 5.84           | <.001                 |
|                          |    |            |              | 22              | -72 | 54  |         |                |                       |
|                          |    |            |              | 8               | -64 | 52  |         |                |                       |

Table 5

*Conjunction analysis: voxels activated for both localise versus blind and sense versus blind contrasts. Cluster FWE  $p < .001$ , minimum 20 voxels.*

References

809

810 Allen, P. J., Josephs, O., & Turner, R. (2000). A Method for Removing Imaging Artifact  
811 from Continuous EEG Recorded during Functional MRI. *NeuroImage*, *12*(2), 230–239.

812 Allen, P. J., Polizzi, G., Krakow, K., Fish, D. R., & Lemieux, L. (1998). Identification  
813 of EEG events in the MR scanner: the problem of pulse artifact and a method for its  
814 subtraction. *Neuroimage*, *8*(3), 229–239.

815 Beck, D. M., Rees, G., Frith, C. D., & Lavie, N. (2001). Neural correlates of change  
816 detection and change blindness. *Nature neuroscience*, *4*(6), 645–650.

817 Bell, A. J., & Sejnowski, T. J. (1996). Edges are the " independent components" of natural  
818 scenes. *NIPS*, 831–837.

819 Benjamini, Y. & Hochberg, Y. (1995). Controlling the False Discovery Rate: A Practical  
820 and Powerful Approach to Multiple Testing. *Journal of the Royal Statistical Society.*  
821 *Series B (Methodological)*, *57*(1), 289–300.

822 Busch, N. A., Dürschmid, S., & Herrmann, C. S. (2010). ERP effects of change localiza-  
823 tion, change identification, and change blindness:. *NeuroReport*, *21*(5), 371–375.

824 Busch, N. A., Fründ, I., & Herrmann, C. S. (2009). Electrophysiological Evidence for  
825 Different Types of Change Detection and Change Blindness. *Journal of Cognitive*  
826 *Neuroscience*, *22*(8), 1852–1869.

827 Bénar, C.-G., Schön, D., Grimault, S., Nazarian, B., Burle, B., Roth, M., Badier, J.-  
828 M., Marquis, P., Liegeois-Chauvel, C., & Anton, J.-L. (2007). Single-trial analysis of  
829 oddball event-related potentials in simultaneous EEG-fMRI. *Human Brain Mapping*,  
830 *28*(7), 602–613.

831 Chetverikov, A., Kuvaldina, M., MacInnes, W. J., Jóhannesson, I., & Kristjánsson,  
832 (2018). Implicit processing during change blindness revealed with mouse-contingent  
833 and gaze-contingent displays. *Attention, Perception, & Psychophysics*, *80*(4), 844–859.

- 834 Debener, S. (2005). Trial-by-Trial Coupling of Concurrent Electroencephalogram and  
835 Functional Magnetic Resonance Imaging Identifies the Dynamics of Performance Mon-  
836 itoring. *Journal of Neuroscience*, *25*(50), 11730–11737.
- 837 Dehaene, S. (2018). The Error-Related Negativity, Self-Monitoring, and Consciousness.  
838 *Perspectives on Psychological Science*, *13*(2), 161–165.
- 839 Dehaene, S. & Changeux, J.-P. (2011). Experimental and Theoretical Approaches to  
840 Conscious Processing. *Neuron*, *70*(2), 200–227.
- 841 Dehaene, S., Changeux, J.-P., Naccache, L., Sackur, J., & Sergent, C. (2006). Conscious,  
842 preconscious, and subliminal processing: a testable taxonomy. *Trends in Cognitive*  
843 *Sciences*, *10*(5), 204–211.
- 844 Dehaene, S. & Naccache, L. (2001). Towards a cognitive neuroscience of consciousness:  
845 basic evidence and a workspace framework. *Cognition*, *79*(1), 1–37. 00000.
- 846 Delorme, A. & Makeig, S. (2004). EEGLAB: an open source toolbox for analysis of  
847 single-trial EEG dynamics including independent component analysis. *Journal of Neu-*  
848 *roscience Methods*, *134*(1), 9–21.
- 849 Eapen, M., Zald, D., Gatenby, J., Ding, Z., & Gore, J. (2011). Using High-Resolution  
850 MR Imaging at 7T to Evaluate the Anatomy of the Midbrain Dopaminergic System.  
851 *American Journal of Neuroradiology*, *32*(4), 688–694.
- 852 Eckert, M. A., Menon, V., Walczak, A., Ahlstrom, J., Denslow, S., Horwitz, A., & Dubno,  
853 J. R. (2009). At the heart of the ventral attention system: The right anterior insula.  
854 *Human Brain Mapping*, *30*(8), 2530–2541.
- 855 Eimer, M. & Mazza, V. (2005). Electrophysiological correlates of change detection. *Psy-*  
856 *chophysiology*, *42*(3), 328–342.
- 857 Fernandez-Duque, D., Grossi, G., Thornton, I. M., & Neville, H. J. (2003). Representa-  
858 tion of Change: Separate Electrophysiological Markers of Attention, Awareness, and  
859 Implicit Processing. *Journal of Cognitive Neuroscience*, *15*(4), 491–507.



- 860 Fernandez-Duque, D. & Thornton, I. M. (2000). Change Detection Without Awareness:  
861 Do Explicit Reports Underestimate the Representation of Change in the Visual Sys-  
862 tem? *Visual Cognition*, 7(1-3), 323–344.
- 863 Fernandez-Duque, D. & Thornton, I. M. (2003). Explicit mechanisms do not account  
864 for implicit localization and identification of change: An empirical reply to Mitroff et  
865 al. (2002). *Journal of Experimental Psychology: Human Perception and Performance*,  
866 29(5), 846–858.
- 867 Friston, K. J., Holmes, A. P., Worsley, K. J., Poline, J.-P., Frith, C. D., & Frackowiak,  
868 R. S. (1994). Statistical parametric maps in functional imaging: a general linear ap-  
869 proach. *Human brain mapping*, 2(4), 189–210.
- 870 Förster, J., Koivisto, M., & Revonsuo, A. (2020). ERP and MEG correlates of visual  
871 consciousness: The second decade. *Consciousness and Cognition*, 80, 102917. 00000.
- 872 Galpin, A., Underwood, G., & Chapman, P. (2008). Sensing without seeing in compara-  
873 tive visual search. *Consciousness and Cognition*, 17(3), 672–687.
- 874 Goldman, R. I., Wei, C.-Y., Philiastides, M. G., Gerson, A. D., Friedman, D., Brown,  
875 T. R., & Sajda, P. (2009). Single-trial discrimination for integrating simultaneous  
876 EEG and fMRI: Identifying cortical areas contributing to trial-to-trial variability in  
877 the auditory oddball task. *NeuroImage*, 47(1), 136–147.
- 878 Hollingworth, A., Williams, C. C., & Henderson, J. M. (2001). To see and remember:  
879 Visually specific information is retained in memory from previously attended objects  
880 in natural scenes. *Psychonomic Bulletin & Review*, 8(4), 761–768.
- 881 Howe, P. D. L. & Webb, M. E. (2014). Detecting Unidentified Changes. *PLoS ONE*,  
882 9(1), e84490.
- 883 Hyvärinen, A. & Oja, E. (1997). A Fast Fixed-Point Algorithm for Independent Compo-  
884 nent Analysis. *Neural Computation*, 9(7), 1483–1492. 04273 Publisher: MIT Press.

- 885 Iannaccone, R., Hauser, T. U., Staempfli, P., Walitza, S., Brandeis, D., & Brem, S. (2015).  
886 Conflict monitoring and error processing: New insights from simultaneous EEG–fMRI.  
887 *NeuroImage*, *105*, 395–407.
- 888 Jarbo, K. & Verstynen, T. D. (2015). Converging Structural and Functional Connectivity  
889 of Orbitofrontal, Dorsolateral Prefrontal, and Posterior Parietal Cortex in the Human  
890 Striatum. *Journal of Neuroscience*, *35*(9), 3865–3878.
- 891 Kanai, R. & Verstraten, F. A. (2004). Visual transients without feature changes are  
892 sufficient for the percept of a change. *Vision Research*, *44*(19), 2233–2240.
- 893 Karnath, H.-O. & Rorden, C. (2012). The anatomy of spatial neglect. *Neuropsychologia*,  
894 *50*(6), 1010–1017.
- 895 Kim, J., Wasserman, E. A., Castro, L., & Freeman, J. H. (2016). Anterior cingulate  
896 cortex inactivation impairs rodent visual selective attention and prospective memory.  
897 *Behavioral Neuroscience*, *130*(1), 75–90.
- 898 Kimura, M., Katayama, J., & Ohira, H. (2008). Event-related brain potential evidence for  
899 implicit change detection: A replication of Fernandez-Duque et al. (2003). *Neuroscience*  
900 *Letters*, *448*(3), 236–239.
- 901 Kleiner, M., Brainard, D., Pelli, D., Ingling, A., Murray, R., & Broussard, C. (2007).  
902 What’s new in Psychtoolbox-3. *Perception*, *36*(14), 1.
- 903 Koivisto, M., Kainulainen, P., & Revonsuo, A. (2009). The relationship between aware-  
904 ness and attention: Evidence from ERP responses. *Neuropsychologia*, *47*(13), 2891–  
905 2899.
- 906 Koivisto, M., Lähteenmäki, M., Sørensen, T. A., Vangkilde, S., Overgaard, M., & Revon-  
907 suo, A. (2008). The earliest electrophysiological correlate of visual awareness? *Brain*  
908 *and Cognition*, *66*(1), 91–103.
- 909 Koivisto, M. & Revonsuo, A. (2010). Event-related brain potential correlates of visual  
910 awareness. *Neuroscience & Biobehavioral Reviews*, *34*(6), 922–934.

- 911 Kouider, S., de Gardelle, V., Sackur, J., & Dupoux, E. (2010). How rich is consciousness?  
912 The partial awareness hypothesis. *Trends in Cognitive Sciences*, 14(7), 301–307. 00292.
- 913 Kouider, S. & Dehaene, S. (2007). Levels of processing during non-conscious perception:  
914 a critical review of visual masking. *Philosophical Transactions of the Royal Society B:  
915 Biological Sciences*, 362(1481), 857–875. 00733.
- 916 Lakens, D. (2013). Calculating and reporting effect sizes to facilitate cumulative science:  
917 a practical primer for t-tests and ANOVAs. *Frontiers in Psychology*, 4.
- 918 Liu, Y., Bengson, J., Huang, H., Mangun, G. R., & Ding, M. (2016). Top-down Modula-  
919 tion of Neural Activity in Anticipatory Visual Attention: Control Mechanisms Revealed  
920 by Simultaneous EEG-fMRI. *Cerebral Cortex*, 26(2), 517–529.
- 921 Luck, S. J. (2014). *An Introduction to the Event-Related Potential Technique*. MIT Press.
- 922 Luck, S. J. & Ford, M. A. (1998). On the role of selective attention in visual perception.  
923 *Proceedings of the National Academy of Sciences*, 95(3), 825–830.
- 924 Luck, S. J. & Gaspelin, N. (2017). How to get statistically significant effects in any ERP  
925 experiment (and why you shouldn't): How to get significant effects. *Psychophysiology*,  
926 54(1), 146–157.
- 927 Luck, S. J. & Hillyard, S. A. (1994). Electrophysiological correlates of feature analysis  
928 during visual search. *Psychophysiology*, 31(3), 291–308.
- 929 Luck, S. J. & Vogel, E. K. (2013). Visual working memory capacity: from psychophysics  
930 and neurobiology to individual differences. *Trends in Cognitive Sciences*, 17(8), 391–  
931 400.
- 932 Lyyra, P., Wikgren, J., Ruusuvirta, T., & Astikainen, P. (2012). Explicit behavioral de-  
933 tection of visual changes develops without their implicit neurophysiological detectabil-  
934 ity. *Frontiers in Human Neuroscience*, 6.
- 935 Menon, V. & Uddin, L. Q. (2010). Saliency, switching, attention and control: a network  
936 model of insula function. *Brain Structure and Function*, 214(5-6), 655–667.

- 937 Mitchell, D. J. & Cusack, R. (2008). Flexible, Capacity-Limited Activity of Posterior  
938 Parietal Cortex in Perceptual as well as Visual Short-Term Memory Tasks. *Cerebral*  
939 *Cortex*, 18(8), 1788–1798.
- 940 Mitroff, S. R., Simons, D. J., & Franconeri, S. L. (2002). The siren song of implicit change  
941 detection. *Journal of Experimental Psychology: Human Perception and Performance*,  
942 28(4), 798–815.
- 943 Mitroff, S. R., Simons, D. J., & Levin, D. T. (2004). Nothing compares 2 views: Change  
944 blindness can occur despite preserved access to the changed information. *Perception &*  
945 *Psychophysics*, 66(8), 1268–1281.
- 946 Nguyen, V. T., Breakspear, M., & Cunnington, R. (2014). Fusing concurrent EEG–fMRI  
947 with dynamic causal modeling: Application to effective connectivity during face per-  
948 ception. *NeuroImage*, 102, 60–70.
- 949 Niedeggen, M., Wichmann, P., & Stoerig, P. (2001). Change blindness and time to  
950 consciousness: Change blindness and time to consciousness. *European Journal of Neu-*  
951 *roscience*, 14(10), 1719–1726.
- 952 Noe, A., Pessoa, L., & Thompson, E. (2000). Beyond the Grand Illusion: What Change  
953 Blindness Really Teaches Us About Vision. *Visual Cognition*, 7(1-3), 93–106.
- 954 Orr, J. M. & Weissman, D. H. (2009). Anterior Cingulate Cortex Makes 2 Contributions  
955 to Minimizing Distraction. *Cerebral Cortex*, 19(3), 703–711.
- 956 Pessoa, L. (2004). Neural Correlates of Change Detection and Change Blindness in a  
957 Working Memory Task. *Cerebral Cortex*, 14(5), 511–520.
- 958 Pourtois, G., De Pretto, M., Hauert, C.-A., & Vuilleumier, P. (2006). Time Course  
959 of Brain Activity during Change Blindness and Change Awareness: Performance is  
960 Predicted by Neural Events before Change Onset. *Journal of Cognitive Neuroscience*,  
961 18(12), 2108–2129.

- 962 Railo, H., Koivisto, M., & Revonsuo, A. (2011). Tracking the processes behind conscious  
963 perception: A review of event-related potential correlates of visual consciousness. *Con-*  
964 *sciousness and Cognition*, *20*(3), 972–983.
- 965 Rensink, R. A. (2004). Visual sensing without seeing. *Psychological Science*, *15*(1), 27–32.
- 966 Rensink, R. A., O'Regan, J. K., & Clark, J. J. (1997). To See or not to See: The Need  
967 for Attention to Perceive Changes in Scenes. *Psychological Science*, *8*(5), 368–373.
- 968 Reynolds, M. G. & Withers, K. (2015). Understanding the relationship between implicit  
969 and explicit change detection: Evidence from scan path data. *Journal of Experimental*  
970 *Psychology: Human Perception and Performance*, *41*(5), 1184–1189.
- 971 Schankin, A. & Wascher, E. (2007). Electrophysiological correlates of stimulus processing  
972 in change blindness. *Experimental Brain Research*, *183*(1), 95–105.
- 973 Scrivener, C. L., Malik, A., Marsh, J., Lindner, M., & Roesch, E. B. (2019). An EEG  
974 study of detection without localisation in change blindness. *Experimental Brain Re-*  
975 *search*.
- 976 Simons, D. & Levin, D. T. (1997). Change Blindness. *Trends in Cognitive Sciences*,  
977 261–267.
- 978 Simons, D. J. (2000). Current Approaches to Change Blindness. *Visual Cognition*, *7*(1-3),  
979 1–15.
- 980 Simons, D. J. & Ambinder, M. S. (2005). Change Blindness: Theory and Consequences.  
981 *Current Directions in Psychological Science*, *14*(1), 44–48.
- 982 Simons, D. J., Nevarez, G., & Boot, W. R. (2005). Visual Sensing Is Seeing: Why  
983 "Mindsight," in Hindsight, Is Blind. *Psychological Science*, *16*(7), 520–524.
- 984 Stanislaw, H. & Todorov, N. (1999). Calculation of signal detection theory measures.  
985 *Behavior Research Methods, Instruments, & Computers*, *31*(1), 137–149.

- 986 Tadel, F., Baillet, S., Mosher, J. C., Pantazis, D., & Leahy, R. M. (2011). Brainstorm:  
987 A User-Friendly Application for MEG/EEG Analysis. 01422 ISSN: 1687-5265 Library  
988 Catalog: [www.hindawi.com](http://www.hindawi.com) Pages: e879716 Publisher: Hindawi Volume: 2011.
- 989 Thornton, I. & Fernandez-Duque, D. (2001). An implicit measure of undetected change.  
990 *Spatial Vision*, 14(1), 21–44.
- 991 Tseng, P., Hsu, T.-Y., Chang, C.-F., Tzeng, O. J. L., Hung, D. L., Muggleton, N. G.,  
992 Walsh, V., Liang, W.-K., Cheng, S.-k., & Juan, C.-H. (2012). Unleashing Potential:  
993 Transcranial Direct Current Stimulation over the Right Posterior Parietal Cortex Im-  
994 proves Change Detection in Low-Performing Individuals. *Journal of Neuroscience*,  
995 32(31), 10554–10561.
- 996 Uddin, L. Q., Nomi, J. S., Hébert-Seropian, B., Ghaziri, J., & Boucher, O. (2017).  
997 Structure and Function of the Human Insula:. *Journal of Clinical Neurophysiology*,  
998 34(4), 300–306.
- 999 Ungerleider, S. K. a. L. G. (2000). Mechanisms of Visual Attention in the Human Cortex.  
1000 *Annual Review of Neuroscience*, 23(1), 315–341.
- 1001 van Belle, J., Vink, M., Durston, S., & Zandbelt, B. B. (2014). Common and unique  
1002 neural networks for proactive and reactive response inhibition revealed by independent  
1003 component analysis of functional MRI data. *NeuroImage*, 103, 65–74.
- 1004 Vogel, E. K. & Machizawa, M. G. (2004). Neural activity predicts individual differences  
1005 in visual working memory capacity. *Nature*, 428(6984), 748–751.
- 1006 Vogel, E. K., McCollough, A. W., & Machizawa, M. G. (2005). Neural measures reveal  
1007 individual differences in controlling access to working memory. *Nature*, 438(7067),  
1008 500–503.
- 1009 Walz, J. M., Goldman, R. I., Carapezza, M., Muraskin, J., Brown, T. R., & Sajda,  
1010 P. (2015). Prestimulus EEG alpha oscillations modulate task-related fMRI BOLD  
1011 responses to auditory stimuli. *NeuroImage*, 113, 153–163.

- 1012 Wilenius, M. E. & Revonsuo, A. T. (2007). Timing of the earliest ERP correlate of visual  
1013 awareness. *Psychophysiology*, *44*(5), 703–710.
- 1014 Williams, P. & Simons, D. J. (2000). Detecting Changes in Novel, Complex Three-  
1015 dimensional Objects. *Visual Cognition*, *7*(1-3), 297–322.
- 1016 Wirsich, J., Bénar, C., Ranjeva, J.-P., Descoins, M., Soulier, E., Le Troter, A., Confort-  
1017 Gouny, S., Liégeois-Chauvel, C., & Guye, M. (2014). Single-trial EEG-informed fMRI  
1018 reveals spatial dependency of BOLD signal on early and late IC-ERP amplitudes during  
1019 face recognition. *NeuroImage*, *100*, 325–336.
